# Supplementary material for: Code-free machine learning for classification of central nervous system histopathology images
Source: PubMed Central journal article supplement (PMC9941804; doi:10.1093/jnen/nlac131), 2023-02-03
Supplement: nlac131_supplementary_data.pdf [file nlac131_supplementary_data.pdf]

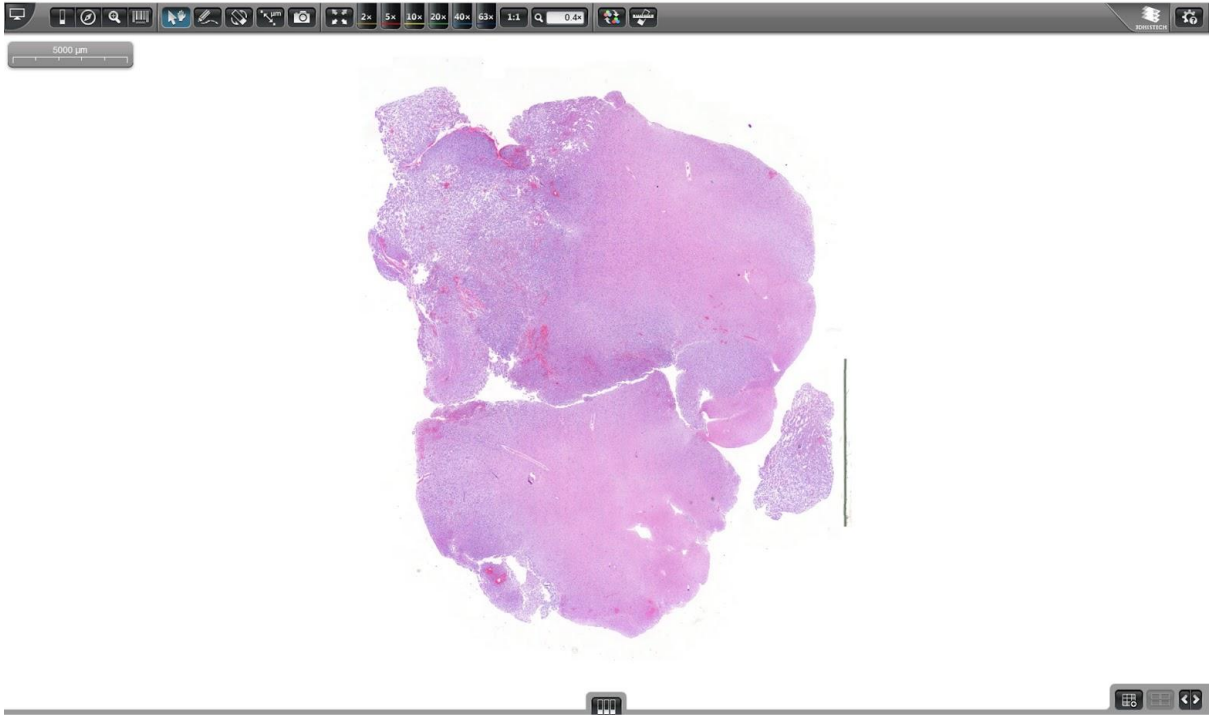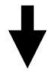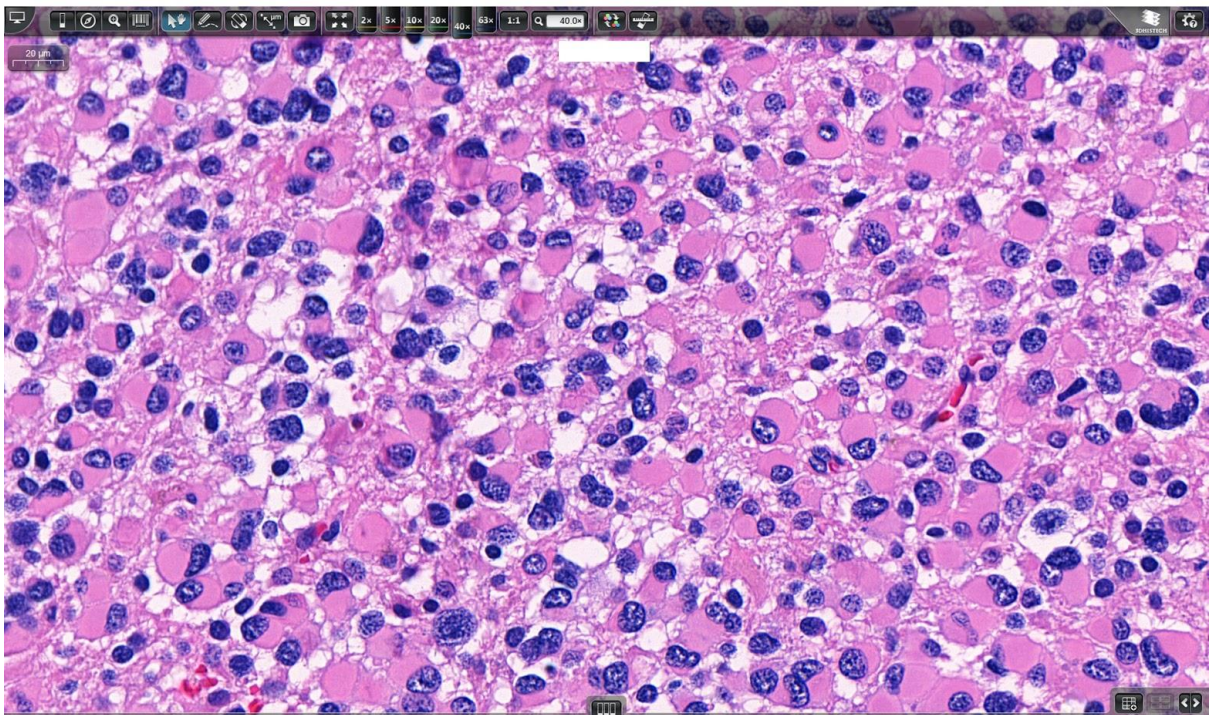

Supplementary figure (generation of histopathological images). Scans (MRXS file format) were reviewed with the CaseViewer (3DHistech, Budapest, Hungary) software. Snapshots of representative pathological regions of interest (ROI) of the scan were made at a nominal 400x magnification (40x “objective”) in JPEG file format.
